# Supplementary material
Source: ML conference proceedings conference paper supplement (https://openreview.net/forum?id=jlTb5di9Eg8)
Supplement: supplementary_material [file attachment]

## 517 A Missing Proofs

### 518 A.1 Proof of Proposition 1

519 **Definition 2.** A metric space is an ordered pair  $(M, d)$  where  $M$  is a set and  $d$  is a metric on  $M$ , i.e.,  
 520 a function  $d: M \times M \rightarrow \mathbb{R}$  such that for any  $x, y, z \in M$ , the following holds:

- 521 1.  $d(x, y) \geq 0, d(x, y) = 0 \Leftrightarrow x = y$ ,
- 522 2.  $d(x, y) = d(y, x)$ ,
- 523 3.  $d(x, z) \leq d(x, y) + d(y, z)$ .

524 The first two properties are obviously guaranteed by  $\overline{D}_W^\rho$ . As for the triangle inequality,

$$\begin{aligned}
 & \mathbb{E}_{s \sim \rho(s)}[D_W(\theta_i(s), \theta_k(s))] \\
 &= \mathbb{E}_{s \sim \rho(s)}\left[\sum_{l=1}^{|\mathcal{A}|} |\theta_i(s) - \theta_k(s)|\right] \\
 &= \mathbb{E}_{s \sim \rho(s)}\left[\sum_{l=1}^{|\mathcal{A}|} |\theta_i(s) - \theta_j(s) + \theta_j(s) - \theta_k(s)|\right] \\
 &\leq \mathbb{E}_{s \sim \rho(s)}\left[\sum_{l=1}^{|\mathcal{A}|} (|\theta_i(s) - \theta_j(s)| + |\theta_j(s) - \theta_k(s)|)\right] \\
 &= \mathbb{E}_{s \sim \rho(s)}\left[\sum_{l=1}^{|\mathcal{A}|} |\theta_i(s) - \theta_j(s)|\right] + \mathbb{E}_{s \sim \rho(s)}\left[\sum_{l=1}^{|\mathcal{A}|} |\theta_j(s) - \theta_k(s)|\right] \\
 &= \mathbb{E}_{s \sim \rho(s)}[D_W(\theta_i(s), \theta_j(s))] + \mathbb{E}_{s \sim \rho(s)}[D_W(\theta_j(s), \theta_k(s))]
 \end{aligned}$$

### 525 B Proof of Proposition 2

$$\begin{aligned}
 \rho_\theta(s) &= P(s_0 = s|\theta) + P(s_1 = s|\theta) + \dots + P(s_T = s|\theta) \\
 &\stackrel{L.L.N.}{=} \lim_{N \rightarrow \infty} \frac{\sum_{i=1}^N I(s_0 = s|\tau_i)}{N} + \frac{\sum_{i=1}^N I(s_1 = s|\tau_i)}{N} + \dots + \frac{\sum_{i=1}^N I(s_T = s|\tau_i)}{N} \\
 &= \lim_{N \rightarrow \infty} \frac{\sum_{j=0}^T \sum_{i=1}^N I(s_j = s|\tau_i)}{N} \\
 \bar{\rho}_\theta(s) &= \sum_{i=1}^N \sum_{j=0}^T \frac{I(s_j = s|\tau_i)}{N} \\
 \mathbb{E}[\bar{\rho}_\theta(s) - \rho_\theta(s)] &= 0
 \end{aligned}$$

## 526 C Implementation Details

### 527 C.1 More Details on WSR

528 **WSR: Penalty Method** The Penalty Method considers the constraints of Eq.(6) by putting con-  
 529 straint  $g(\theta)$  into a penalty term, followed by solving the following unconstrained problem in an  
 530 iterative manner,

$$\max_{\theta \in \Theta} f(\theta) + \frac{1 - \alpha}{\alpha} \min\{g(\theta), 0\}, \quad (8)$$

531 The limit of the above unconstrained problem when  $\alpha \rightarrow 0$  then leads to the solution of the original  
 532 constrained problem. As an approximation, WSR chooses a fixed weight  $\alpha$ , and uses the gradient of  
 533  $\nabla_\theta f + \frac{1-\alpha}{\alpha} \nabla_\theta g$  instead of  $\nabla_\theta f + \frac{1-\alpha}{\alpha} \nabla_\theta \min\{g(\theta), 0\}$ , thus the final solution will intensely rely  
 534 on the selection of  $\alpha$ .

## 535 C.2 Calculation of $D_W$

536 We use deterministic part of policies in the calculation of  $D_W$ , i.e., we remove the Gaussian noise on  
537 the action space in PPO and use  $D_W(a_1, a_2) = |a_1 - a_2|$ .

## 538 C.3 Network Structure

539 We use MLP with 2 hidden layers as our actor models in PPO. The first hidden layer is fixed to  
540 have 32 units. We choose to use 10, 64 and 256 hidden units for the three tasks respectively in all of  
541 the main experiments, after taking the success rate, performance and computation expense (i.e. the  
542 preference to use less unit when the other two factors are similar) into consideration.

## 543 C.4 Training Timesteps

544 We fix the training timesteps in our experiments. The timesteps are fixed to be 1M in Hopper-v3,  
545 1.6M for Walker2d-v3 and 3M for HalfCheetah-v3.

# 546 D Visualize Diversity

## 547 D.1 Mujoco Locomotion

548 In this section, we provide some qualitative results of IPD on the Mujoco locomotion tasks. In all  
549 of our experiments we use the vanilla Mujoco locomotion benchmarks, with the default settings on  
550 defining healthy states. Although otherwise the visualization of learned policies might become more  
551 diverse (e.g., a Hopper agent may learn to stand-up after falling down while another agent may learn  
552 to move forward on the ground if we set the  $z$ -axis healthy threshold as 0).

553 With the method of IPD, the Hopper policies (Figure 5) learns to jump further and avoids falling  
554 down rather instead of just jumping and falling down (Figure 6). In the Walker2d environment, the  
555 color of purple indicates the left leg is visible. It can be seen that the IPD policies (Figure 7) learn to  
556 use both left and right legs in walking, while the PPO policies usually learn jumping. (Figure 8). In  
557 HalfCheetah, the IPD policies (Figure 9) perform much better than the PPO policies (Figure 10). The  
558 IPD policies learn to run with head-downward (Figure 9 line 1), head-upward (Figure 9 line 3), and  
559 forward (Figure 9 line 5) while the PPO policies are always head-downward.

560 In Hopper and HalfCheetah, IPD is able to improve the primal task performance by avoiding always  
561 getting trapped in some certain sub-optimal behaviors.

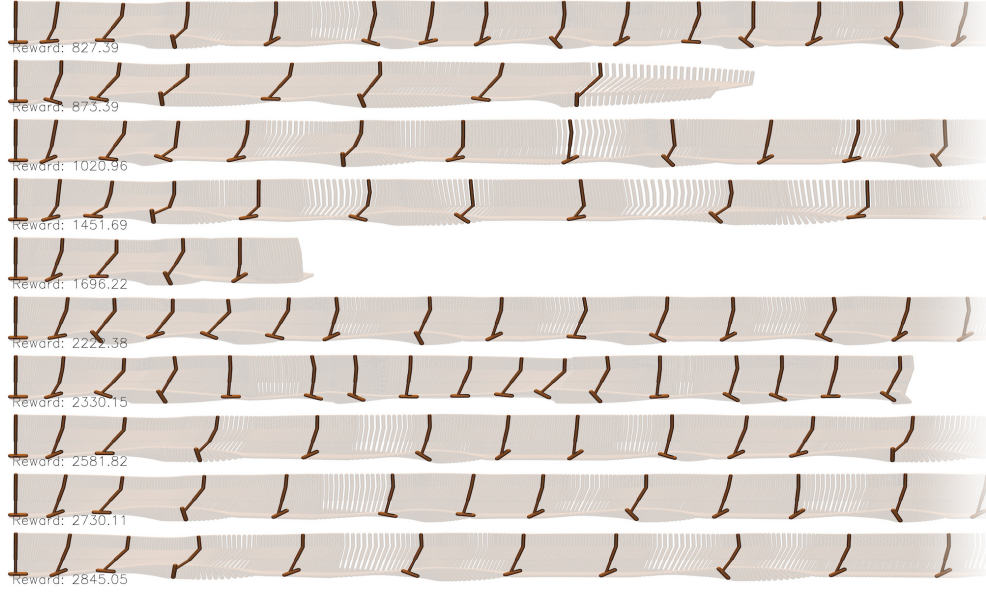

Figure 5: The visualization of policy behaviors of agents trained by our method in Hopper-v3 environment. Agents learn to jump with different strides.

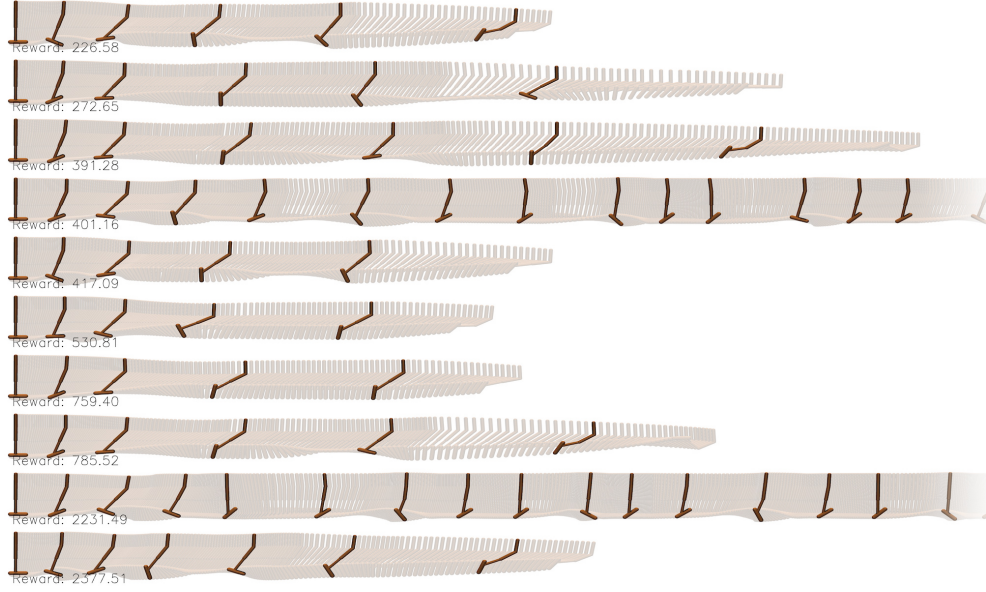

Figure 6: The visualization of policy behaviors of agents trained by PPO in Hopper-v3 environment. Most agents learn a policy that can be described as *Jump as far as possible and fall down*, leading to relative poor performance.

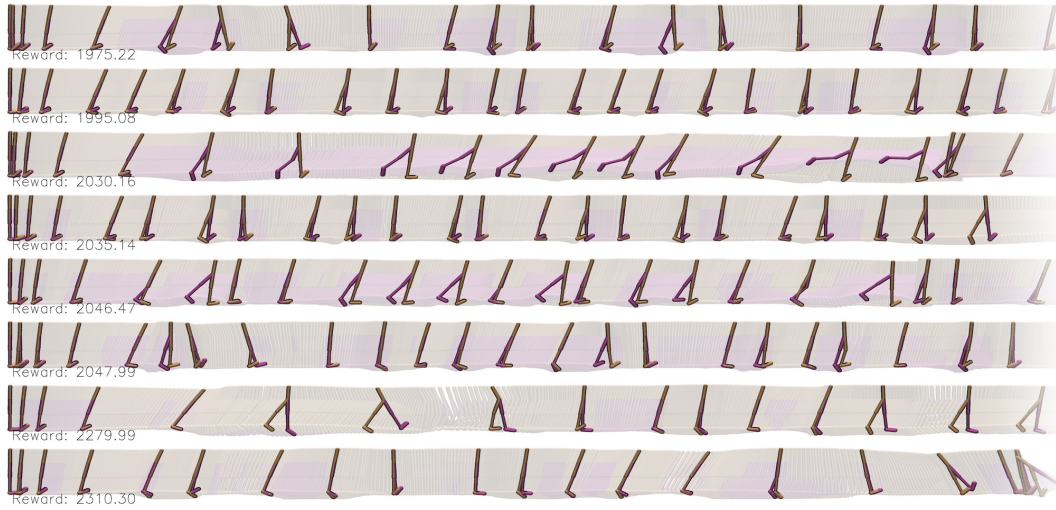

Figure 7: The visualization of policy behaviors of agents trained by our method in Walker2d-v3 environment. Instead of bouncing at the ground using both legs, our agents learn to use both legs to step forward.

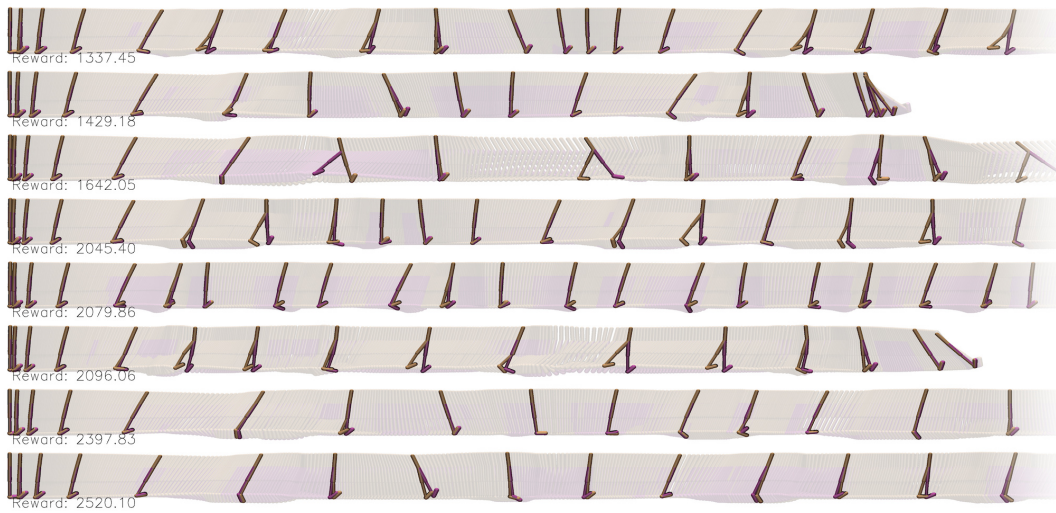

Figure 8: The visualization of policy behaviors of agents trained by PPO in Walker2d-v3 environment. Most of the PPO agents only learn to use their right leg to support the body and jump forward.



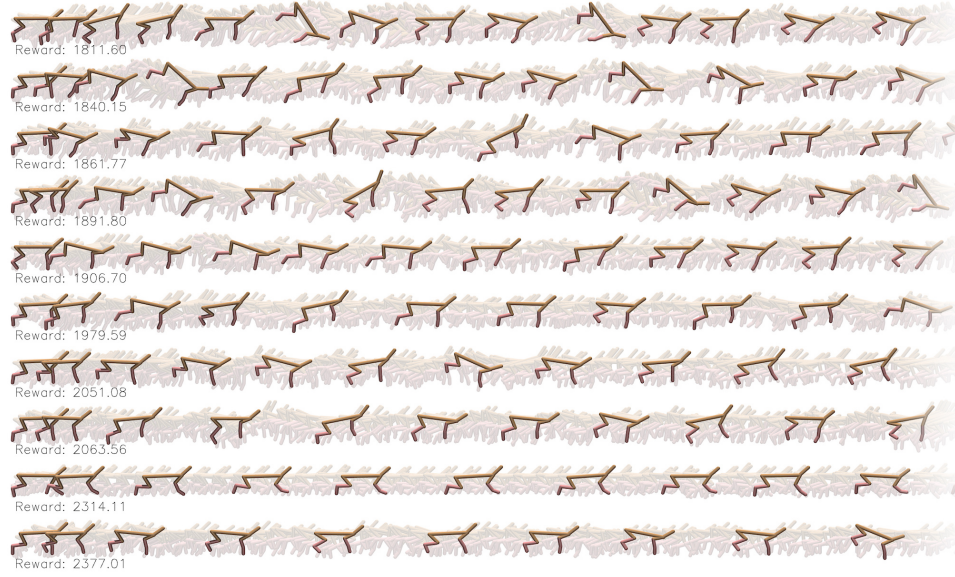

Figure 9: The visualization of policy behaviors of agents trained by our method in HalfCheetah-v3 environment. Our agents run much faster compared to PPO agents and at the mean time several patterns of motion have emerged.

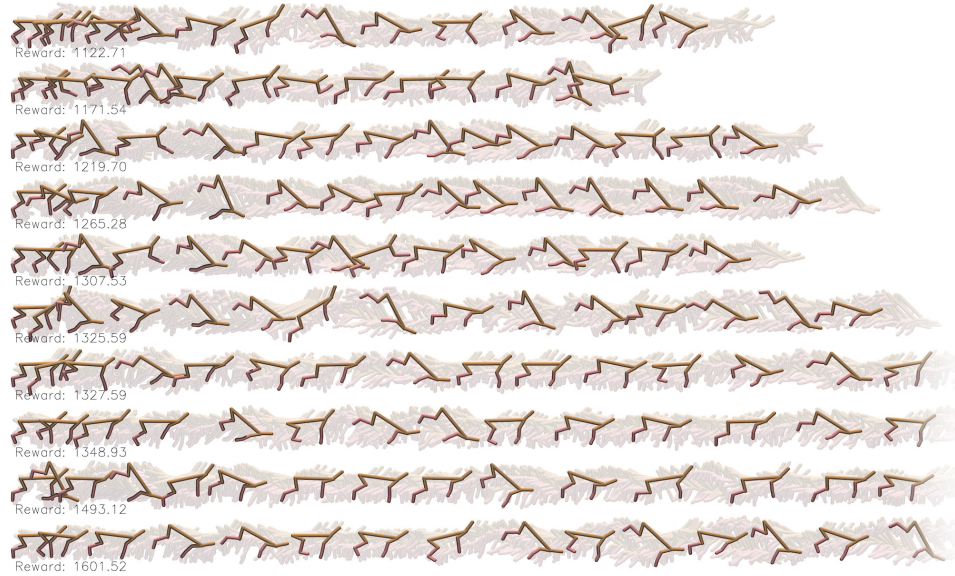

Figure 10: The visualization of policy behaviors of agents trained by PPO in HalfCheetah-v3 environment. Since we only draw fixed number of frames in each line, in the limited time steps the PPO agents can not run enough distance to leave the range of our drawing, which shows that our agents run much faster.
